# Supplementary material for: Activation of the PERK-ATF4 pathway promotes chemo-resistance in colon cancer cells
Source: PubMed Central journal article supplement (PMC6397152; doi:10.1038/s41598-019-39547-x), 2019-03-01

## **Title**

Activation of the PERK-ATF4 pathway promotes chemo-resistance in colon cancer cells

## **Authors**

Zhong Shi<sup>#1</sup>, Xiaofu Yu<sup>#2</sup>, Meiqin Yuan<sup>1</sup>, Wangxia Lv<sup>1</sup>, Tingting Feng<sup>1</sup>, Rui Bai<sup>3</sup>, Haijun Zhong<sup>\*1</sup>

<sup>#</sup>The authors contributed equally to this work.

<sup>1</sup>Department of Medical Oncology, Zhejiang Cancer Hospital, Hangzhou 310022, China

<sup>2</sup>Department of Radiotherapy, Zhejiang Cancer Hospital, Hangzhou 310022, China

<sup>3</sup>Department of Medical Oncology, Hangzhou Cancer Hospital, Hangzhou 310000, China

**Corresponding author:**

Haijun Zhong, Tel +8657188122052, Fax +8657188122058, email address:

zhonghj@zjcc.org.cn

## Supplementary Figure Legends

Figure S1. Activation of the unfolded protein response pathways in colon cancer cells

(A) Realtime RT-PCR showing the relative expression level of ATF6 and GADD34 mRNA in six colon cancer cells. GAPDH was used as loading control. (B) Western blot showing the effects of Thapsigargin (100 nM) on PERK-ATF4 pathway and IRE1-sXBP1 in SW1116, Colo320DM and SW480 cells. GAPDH was used as loading control. (C) Luciferase reporter assay showing the effects of Thapsigargin (100 nM) on ATF6 activity in SW1116, Colo320DM and SW480 cells. Data are represented as mean  $\pm$  SEM or the mean alone.

Figure S2. Correlation of the IRE1 and ATF6 pathway and sensitivities of colon cancer cells to 5-fluorouracil treatment

(A) and (B) and (C) Correlation analysis of the expression of spliced XBP-1, activity of ATF6 or the expression of BiP and EC50 of 5-FU in colon cancer cells. (D) Luciferase reporter assay showing the effects of 5-FU treatment on ATF6 activity in SW1116, Colo320DM and SW480 cells. (E) Western blot showing the effects of PERK knockdown on eIF2 $\alpha$  expression in SW620 cells. Alpha Tubulin was used as loading control. (F) Western blot showing the effects of GCN2 and PKR knockdown on eIF2 $\alpha$  and ATF4 expression in SW620 cells. GAPDH was used as loading control. (G) and (H) Western blot showing knockdown effects of shRNAs targeting ATF4 and IRE1 in SW620 cells. GAPDH was used as loading control. (I) Realtime RT-PCR showing knockdown effects of shRNAs targeting ATF6 in SW620 cells. GAPDH was used as loading control. (J) Dose response curves showing responses of SW620 cells transduced with a hairpin targeting Luciferase (shLuc) or two hairpins targeting IRE1 (shIRE1-1, shIRE1-2) to treatment of 5-FU. (K) Dose response curves showing responses of SW620 cells transduced with a hairpin targeting Luciferase (shLuc) or two hairpins targeting ATF6 (shATF6-1, shATF6-2) to treatment of 5-FU. Data are represented as mean  $\pm$  SEM or the mean alone.

Figure S3. Chemical inhibition of PERK sensitizes colon cancer cells to 5-Fluorouracil treatment

(A) Western blot showing the effects of a PERK inhibitor (1  $\mu\text{M}$ ) on its downstream target eIF2 $\alpha$  in SW620 and SW480 cells. GAPDH was used as loading control. (B) Dose response curves showing the effects of the PERK inhibitor (0.1  $\mu\text{M}$ ) in sensitizing SW620 cells to 5-FU treatment. (C) Dose response curves showing effects of the IRE1 inhibitor (10  $\mu\text{M}$ ) in sensitizing SW620 cells to 5-FU treatment. (D) CT26 cells were treated as indicated, and the level of total PERK, p-PERK, and p-eIF2 $\alpha$  was measured by western blotting. (E) Dose response curves showing effects of the PERK inhibitor (0.1  $\mu\text{M}$ ) in sensitizing CT26 cells to 5-FU treatment. Data are represented as mean  $\pm$  SEM or the mean alone.

Figure. S4 and S5

Raw data of the western blots used in this study.

Figure S1

A

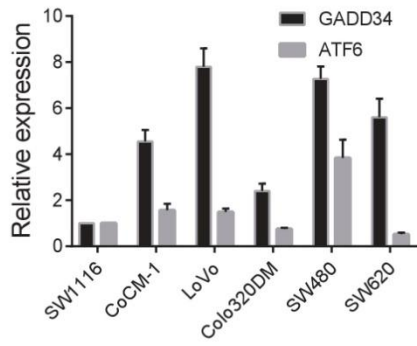

B

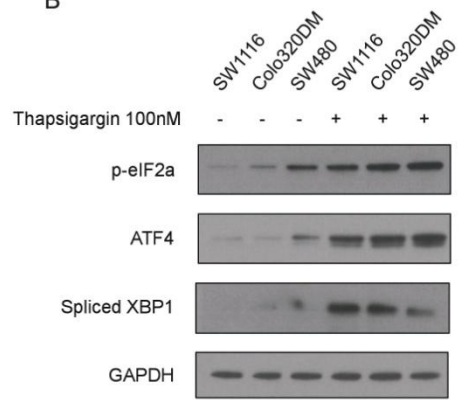

C

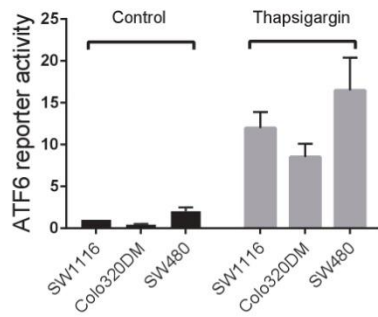

Figure S2

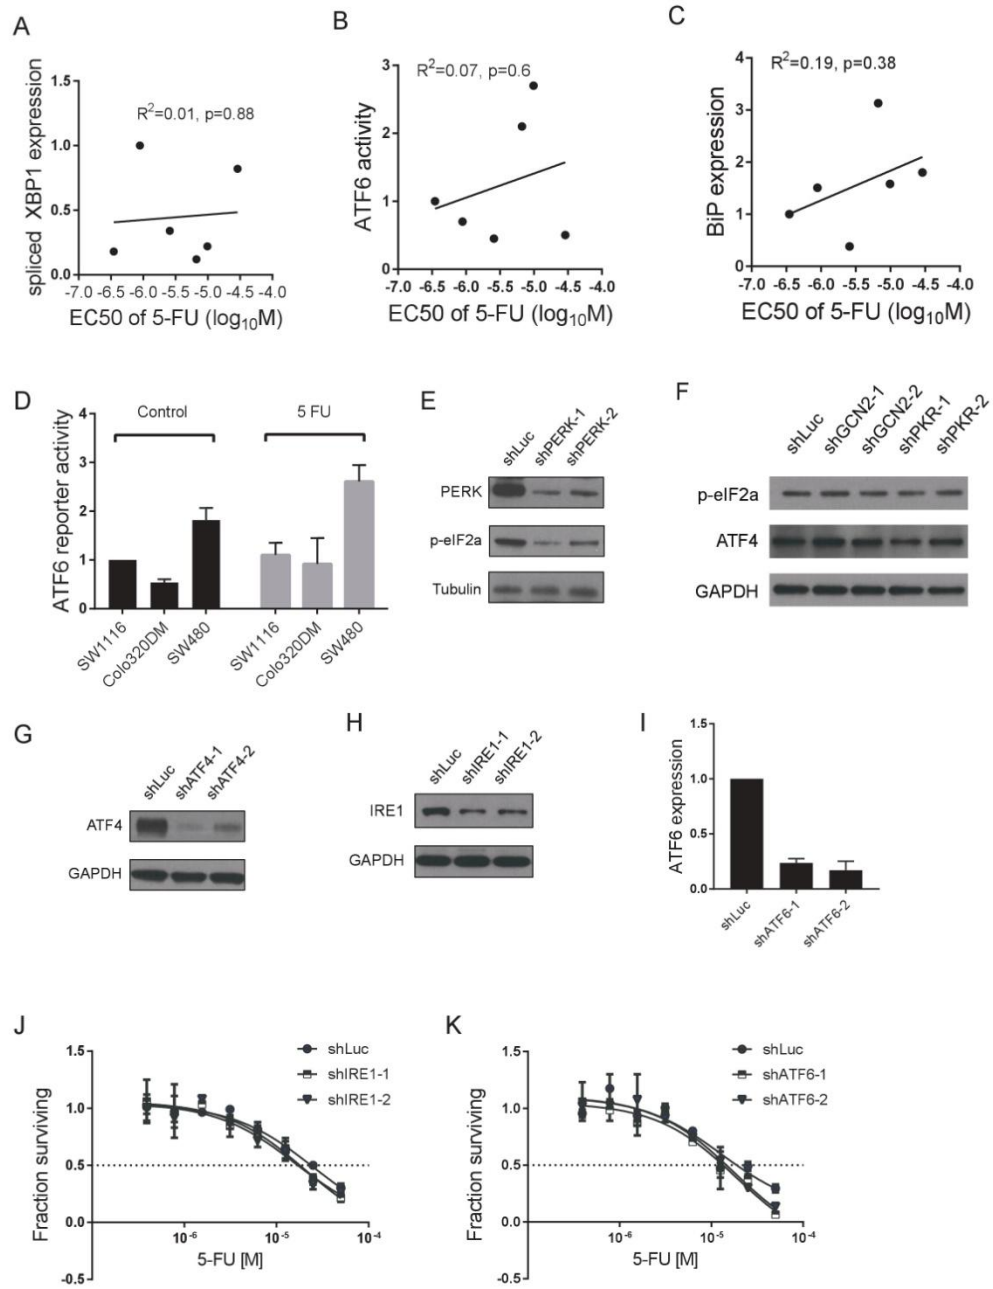

Figure S3

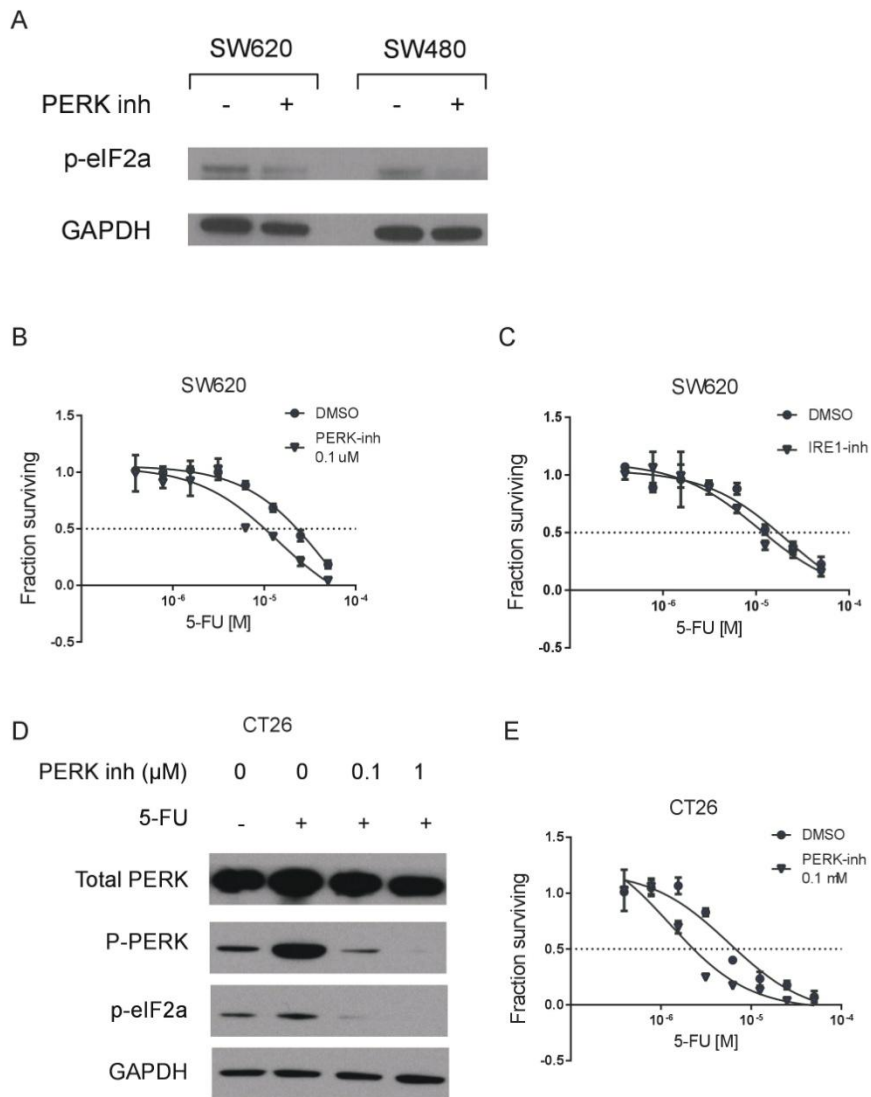

## Figure S4

This blot is used in Figure 1A (PERK).

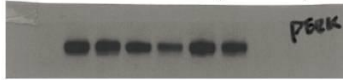

This blot is used in Figure 1A (p-eIF2 $\alpha$ ).

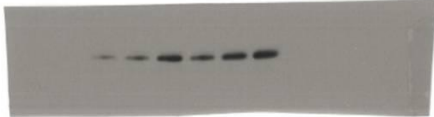

This blot is used in Figure 1A (total p-eIF2 $\alpha$ ).

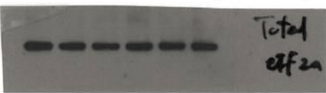

This blot is used in Figure 1A (ATF4).

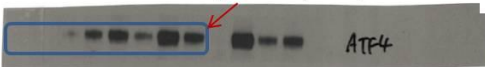

This blot is used in Figure 1A (GAPDH).

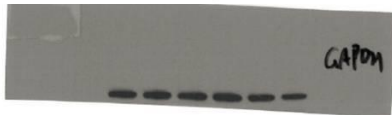

This blot is used in Figure 2E (p-eIF2 $\alpha$ ).

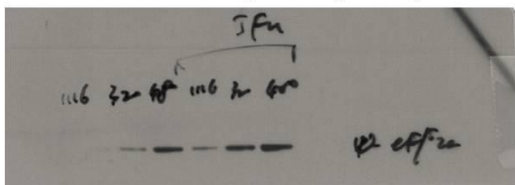

This blot is used in Figure 1B (IRE1).

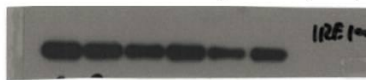

This blot is used in Figure 1B (spliced XBP1).

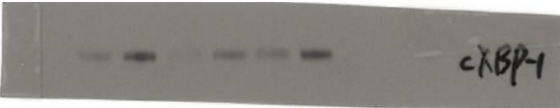

This blot is used in Figure 1B (Tubulin).

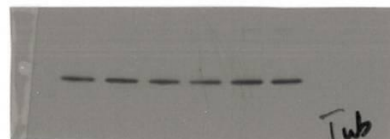

This blot is used in Figure 2E (ATF4).

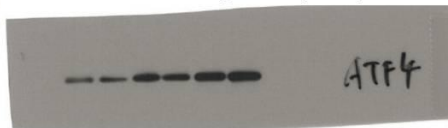

This blot is used in Figure 2E (spliced XBP1).

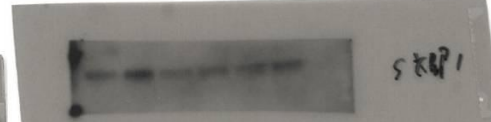

This blot is used in Figure 2E (GAPDH).

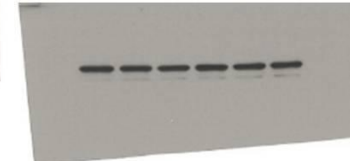

Figure S5

This blot is used in Figure 3A (ATF4).

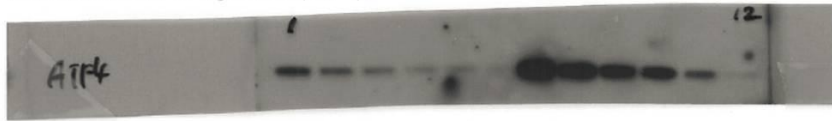

This blot is used in Figure 3A (Actin).

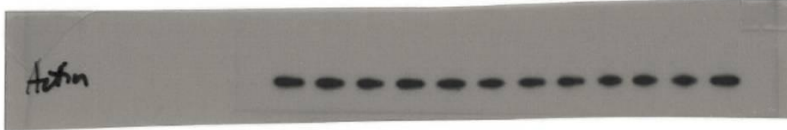

This blot is used in Figure 3E (cleaved PARP).

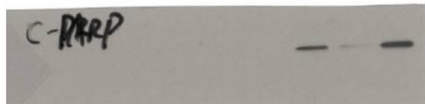

This blot is used in Figure 3E (GAPDH).

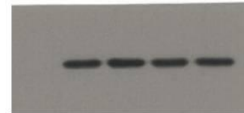

This blot is used in Figure 4E (ATF4).

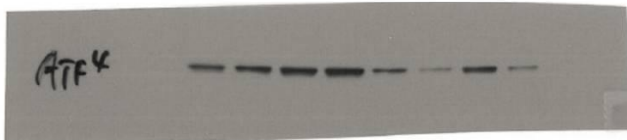

This blot is used in Figure 4E (cleaved PARP).

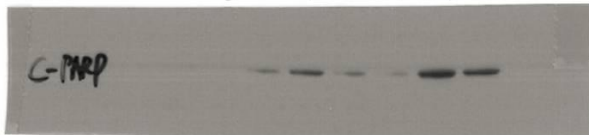

This blot is used in Figure 4E (Actin).

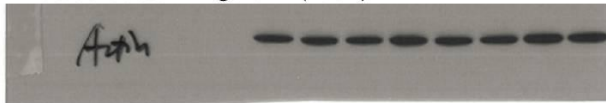

Supplement: 41598_2019_39547_MOESM1_ESM.pdf [file 41598_2019_39547_MOESM1_ESM.pdf]
